1 **Czech Republic butterfly barcoding reveals that distribution of genetic lineages depends**  
2 **on species traits**

3  
4

5 **Running title:**

6 Czech butterfly barcoding

7  
8

9 Alena SUCHÁČKOVÁ BARTOŇOVÁ<sup>1\*</sup>, Patrik ŠKOPEK<sup>3</sup>, Martin KONVIČKA<sup>1,2</sup>, Jiří  
10 BENEŠ<sup>1</sup>, Lukáš SPITZER<sup>1,4</sup>, Claudio SBARAGLIA<sup>1,2</sup>, Vladimír VRABEC<sup>3</sup>, Jana PAPP  
11 MAREŠOVÁ<sup>1,2</sup>, Hana KONVIČKOVÁ<sup>1,2</sup> & Zdeněk FALTÝNEK FRIC<sup>1,3</sup>

12  
13

14 <sup>1</sup> Biology Centre of the Czech Academy of Sciences, Institute of Entomology, Branišovská  
15 31, 370 05 České Budějovice, Czech Republic

16 <sup>2</sup> University of South Bohemia in České Budějovice, Faculty of Science, Branišovská 1760,  
17 370 05 České Budějovice, Czech Republic

18 <sup>3</sup> Czech University of Life Sciences Prague, Faculty of Agrobiological Sciences, Food and Natural  
19 Resources, Kamýcká 129, 165 00 Praha – Suchbátka, Czech Republic

20 <sup>4</sup> Museum of the Moravian Wallachia Region, Horní náměstí 2, 755 01 Vsetín, Czech  
21 Republic

22

23 \*Correspondence: Alena Sucháčková Bartoňová, [al.bartonova@gmail.com](mailto:al.bartonova@gmail.com), +420731856818

24 **ACKNOWLEDGEMENTS**

25

26 The work was supported by the Technology Agency of the Czech Republic (SS01010526).

27 We would like to thank the Nature Conservation Agency of the Czech Republic and Ministry

28 of the Environment of the Czech Republic, as well as all the local conservation authorities

29 (National Parks and Protected Landscape Areas). The following colleagues helped us with

30 material: Oldřich Čížek, Marek Fišer, Vladimír Hula, Tomáš Kadlec, František Kopeček,

31 Tomáš Kuras, Dan Leština, Zdeněk Mráček, Alois Pavlíčko, David Ričl, Ondřej Sedláček,

32 Pavel Skala, Přemysl Tájek, Pavel Vrba, and Jan Walter. We would also like to thank Petr

33 Šmilauer for consultation on statistics, Pedro de G. Ribeiro and Marie Drábková for

34 comments on the manuscripts, and Matthew Sweney for English correction.

35 **ABSTRACT**

36

37 **Aim:** The distribution of within-species lineages has been affected by Quaternary climate  
38 changes, and population differentiation has been influenced by species life histories. We  
39 investigated whether the distribution of individual mitochondrial genetic lineages reflects the  
40 constituent species' traits. Using the functionally diverse group of butterflies, we examined  
41 which lineages are present in Central Europe, an important suture zone.

42 **Location:** Europe

43 **Taxon:** A total of 140 butterfly species.

44 **Methods:** We sequenced barcodes (cytochrome c oxidase 1) of the entire Czech Republic  
45 butterfly fauna (~ 1000 sequences) and used database data to visualize the species'  
46 biogeographic patterns across Europe. We categorised the distribution patterns of lineages  
47 inhabiting the Czech Republic, and used multivariate statistics to interpret these categories by  
48 the butterflies' habitats, life histories, and threat levels.

49 **Results:** Open habitat dwellers with specialist traits belonged to Eastern, Southern, and  
50 temperate lineages. Habitat generalists and woodland dwellers belonged to the Western  
51 lineage, formed several lineages, or displayed low genetic diversity; they often developed on  
52 woody plants, were large-winged, and had long flight periods. The most threatened species  
53 were the specialists of Southern, Eastern, and temperate lineages.

54 **Main conclusions:** The distribution of lineages in Central Europe reflects the history of  
55 Quaternary ecosystems: during cold periods of the Pleistocene, the diverse open habitats  
56 prevailed, and species could expand westwards. Such species also suffer the most under the  
57 current anthropogenic habitat alteration. On the other hand, the mobile generalists and  
58 woodland dwellers expanded to Central Europe during the Holocene. Our approach of linking  
59 the distribution of lineages with species traits can be transferred to other study systems, and  
60 we show that barcoding of under-sampled areas represents a powerful tool for discovering the  
61 driving forces of biogeography.

62

63

64 **KEYWORDS**

65

66 Barcoding library, COI, insects, Lepidoptera, life history, mitochondrial DNA,  
67 phylogeography, refugia theory

## 68 INTRODUCTION

69

70 Population genetic differentiation is affected by species' range sizes, life histories, and  
71 samples' geographic origins (Dapporto et al., 2019; Gamba & Muchhala, 2020; Miller et al.,  
72 2021). In temperate regions, the distribution of different genetic lineages, i.e., the groups of  
73 populations with shared history, has been massively influenced by Quaternary climate change  
74 (Hewitt, 2000; 2004; Schmitt, 2007; Hofreiter & Stewart, 2009). Thus, a population  
75 inhabiting an area might be the result of combining the landscape history with trait-mediated  
76 divergence.

77 Under the Quaternary's dynamic conditions, Europe's unique geographic idiosyncrasy  
78 was influencing the distribution of genetic lineages, i.e., the groups of populations with a  
79 common history. In Europe, there are three peninsulas of a limited area with a Mediterranean  
80 climate functioning as speciation centres, east-west oriented mountain ridges acting as  
81 barriers, and a gradient between oceanic climate in the west and continental climate in the  
82 east. These factors guided and limited expansions and contractions of species' ranges. During  
83 the shorter warm stages of the Quaternary, warm-adapted species expanded from  
84 Mediterranean peninsulas or other limited areas (refugia), while cold-adapted species  
85 retreated uphill and northwards (de Lattin, 1967; Hewitt, 1996, 1999; Schmitt, 2007; Schmitt  
86 & Varga, 2012). Simultaneously, continental species tended to retreat eastwards (Stewart,  
87 Lister, Barnes, & Dalén, 2010). Notably, Central Europe represents a crossroad of different  
88 lineages (Janoušek et al., 2012; Pfäffle, Bolfíková, Hulva, & Petney, 2014; Nürnberger,  
89 Lohse, Fijarczyk, Szymura, & Blaxter, 2016). This area went through immense changes  
90 during the Quaternary, with an exchange of biota between the cold and warm stages (Horáček  
91 & Ložek, 1988), while the landscape varied from a cold steppe-tundra to open park-like  
92 woodlands (Kahlke, 2014; Sandom, Ejrnæs, Hansen, & Svenning, 2014; Vera, 2000).

93 A feasible method to evaluate genetic differentiation and lineage distribution on large-  
94 scale data is DNA barcoding, i.e., sequencing a short standardized gene fragment, which  
95 originally aimed for a simple tool to distinguish species (Hebert, Cywinska, Ball, & deWaard,  
96 2003). An important step towards this goal was building world-wide databases covering as  
97 many species as possible (e.g., Ratnasingham & Hebert 2007; Geiger et al., 2014; Hendrich et  
98 al., 2015; Galimberti et al., 2021; Dincă et al., 2021). The barcode widely used in various  
99 animal groups, mitochondrial gene cytochrome c oxidase subunit I (COI), proved effective  
100 not only for species identification (Hebert, Ratnasingham, & de Waard, 2003), but also for  
101 uncovering cryptic diversity including discovery of new species (Hernández-Roldán et al.,

102 2016), and phylogeographic and population genetic studies (Kühne, Kosuch, Hochkirch, &  
103 Schmitt, 2017; Maresova et al., 2021). The existence of large database data allowed testing  
104 the barcoding performance across large scales on entire faunal groups, summarizing genetic  
105 diversity and uncovering biogeographic patterns (e.g., Meier et al., 2006; Weigand et al.,  
106 2019; Dincă et al., 2021; D’Ercole et al., 2021; Dapporto et al., 2022).

107 European butterflies are one of the best barcoded groups of organisms, represented by  
108 several national and international barcoding libraries (Dincă, Zakharov, Hebert, & Vila, 2011;  
109 Dincă et al., 2015, 2021; Hausmann et al., 2011; Huemer, Mutanen, Sefc, & Hebert, 2014;  
110 Huemer et al., 2018; Litman et al., 2018; Dapporto et al., 2022). Geographic patterns of  
111 diversity and differentiation are extraordinarily well-explored, especially for south-western  
112 Europe (Dapporto et al., 2019, 2022; Dincă et al., 2021). The database data are exceptionally  
113 represented in the Mediterranean peninsulas, where genetic diversity is elevated (Dincă et al.,  
114 2021).

115 In this study, we focused on the butterfly fauna of the Czech Republic, a functionally  
116 diverse group inhabiting a defined region, as a model for evaluation of how different genetic  
117 lineages within species are filtered. We view the Czech Republic, situated in Central Europe,  
118 as a sieve of species that either reached the area during the Holocene, or survived there since  
119 the last glaciation. The Czech butterfly fauna consists of both generalists and specialists of  
120 diverse habitats, dry and wet, lowland and highland, and of different stages of habitat  
121 openness, whose life histories are known in considerable detail (Bartonova, Benes, &  
122 Konvicka, 2014; Macek, Laštůvka, Beneš, & Traxler, 2015), and at the same time have one of  
123 the highest threat values in Europe (Warren et al., 2021). We collated barcoding database data  
124 of 140 species (~98% of extant Czech butterfly fauna) across their ranges, sequenced samples  
125 of Czech populations, analysed their mitochondrial phylogeographic structure, and related  
126 them to species-specific traits. We demonstrate that lineages do not enter a region randomly,  
127 but do so with respect to individual species’ habitat affinities and life histories. Moreover, the  
128 processes are related to current threat levels, so that individual species’ genetic backgrounds  
129 predetermine their future.

130  
131  
132  
133  
134  
135

## 136 MATERIAL AND METHODS

137

### 138 DNA sequencing and analyses

139

140 Czech butterfly fauna consists of 141 species including migrants, plus six irregular vagrants,  
141 and a further 16 species that are considered extinct (Benes et al., 2002; Wiemers et al., 2018).  
142 We collated samples from 140 butterfly species originating from the Czech Republic (CZ)  
143 (Figure 1a), from the years 2004–2022. The dataset comprises all the extant species except for  
144 *Melitaea phoebe* (recent colonizer), *Parnassius apollo* (existing as a conservation-dependent  
145 reintroduced population), and *Hyponephele lycaon* (recently extinct in the country), but  
146 including *Pieris manni*, which newly recolonized the country, and a rare vagrant, *Leptotes*  
147 *pirithous*. We also sequenced one specimen of *Lampides boeticus*, imported with fruit from  
148 Spain (not included in analyses).

149 We extracted DNA from the butterfly legs using Genomic DNA Mini Kit (Tissue)  
150 (Geneaid Biotech Ltd., New Taipei, Taiwan). We amplified the barcode, first part of COI,  
151 using primers hybLCO (5'-  
152 TAATACGACTCACTATAGGGGGTCAACAAATCATAAAGATATTGG-3') and  
153 hybHCO (5'-ATTAACCCTCACTAAAGGGTAAACTTCAGGGTGACCAAAAAATCA-3')  
154 (Folmer, Black, Hoeh, Lutz, & Vrijenhoek, 1994). In the case of fragmented DNA, we used  
155 two pairs of primers: [LCO-K699] + [Ron-HCO] (K699: 5'-  
156 ATTAACCCTCACTAAAGGGWGGGGGGTAAACTGTTCATCC-3'; Ron: 5'-  
157 TAATACGACTCACTATAGGGGGATCACCTGATATAGCATTCCC-3')  
158 (www.nymphalidae.net; Monteiro & Pierce 2001). The mixture for each sample consisted of  
159 4 µl of PCR H<sub>2</sub>O, 0.625 µl of each primer, 6.25 µl of Bioline 2x MyTaq HS Red Mix  
160 (Meridian Bioscience Inc., Memphis, Tennessee, USA), and 2 µl of extracted DNA. The  
161 polymerase chain reaction protocol consisted of 95°C for 5 min; followed by 40 cycles of  
162 94°C for 30 s, 50°C for 30 s, and 72°C for 90 s; with a final extension of 72°C for 10 min.  
163 Sequencing was performed in Macrogen Inc. (Amsterdam, Netherlands). The sequences were  
164 checked, trimmed, and aligned in Geneious v. 8.0.5 (Kearse et al., 2012). We downloaded all  
165 COI sequences for each species occurring in the Czech Republic from the BOLD database  
166 (Ratnasingham & Hebert, 2007) (for 12 October 2022) which were georeferenced and  
167 sequenced from the 5' end. We aligned the samples together with the newly sequenced data.

168 We analysed each species dataset separately. Members of species pairs known to share  
169 haplotypes or not monophyletic in the barcode (Dincă et al., 2011) were treated separately

170 (specifically *Colias crocea/erate*, *Cupido decoloratus/alcetas*, *Erebia euryale/ligea*, *Pieris*  
171 *napi/bryoniae*, *Polyommatus bellargus/coridon*, *Pseudophilotes baton/vicrama*) because of  
172 their unique species traits.

173

### 174 **Phylogeographic patterns**

175

176 For each species, we performed two phylogeographic analyses: (1) Bayesian Analysis of  
177 Population Structure (BAPS) (Cheng, Connor, Sirén, Aanensen, & Corander, 2013), which  
178 sorts data into clusters of related sequences (*genetic lineages*), in R package ‘rhierbaps’  
179 (Tonkin-Hill, Lees, Bentley, Frost, & Corander, 2018), on level 1, automatically estimating  
180 the number of clusters; and (2) TCS haplotype networks in POPART (Leigh & Bryant, 2015),  
181 a parsimony method which, additionally, shows putative evolutionary relationships among  
182 samples. In both cases, we checked the results visually and cleaned the dataset as to omit  
183 database samples which were either shorter than 500 bp, or potentially misidentified  
184 (dissimilarity of sequences represented by long branches in haplotype networks was evaluated  
185 using the BLAST algorithm, Altschul et al., 1990, in the NCBI database).

186 We plotted the distribution of BAPS clusters on a map of Europe using the geographic  
187 coordinates of the samples. Then, we manually assigned the lineages present in the Czech  
188 Republic to one of the following categories, or to two, if two specific lineages were present:  
189 (1) *BAPS-low*: low genetic diversity – only a single BAPS cluster in the entire species; (2)  
190 *BAPS-wide*: a lineage widely distributed across Europe also present in CZ (but more lineages  
191 are present within the species); (3) *BAPS-mix*: two or more widespread European lineages are  
192 present in CZ; (4) *BAPS-West*: the CZ samples related to samples from Western Europe; (5)  
193 *BAPS-Italy-Balkans*: the CZ samples related to those from Italy or Italy plus the Balkans; (6)  
194 *BAPS-East-Balkans*: the CZ samples are related to those from the Balkans or Balkans plus  
195 Eastern Europe/Asia; (7) *BAPS-mix-East*: CZ samples consist of more lineages distributed in  
196 Italy/Balkans or East/Balkans; (8) *BAPS-Central*: the Central European mountains or  
197 Pannonian lowlands produced a separate lineage to which CZ samples belong; and (9) *BAPS-*  
198 *temperate*: the CZ samples are related to lineages inhabiting a similar latitudinal belt, not  
199 present in the Mediterranean peninsulas.

200 The results of haplotype networks were scored based on the position of the haplotypes  
201 found in CZ to haplotypes distant from them with maximum of two mutations. When the  
202 Czech samples were part of a widespread lineage, the supposed demographic scenario from  
203 the net was visually estimated. The categories were: (1) *HAP-low*: low diversity or expansion

204 (star-like haplotype structure) in the entire species. Then, in categories (2)–(4), the Czech  
205 samples are part of a widespread European lineage (another, diverged lineage exists in the  
206 network), but the (2) *HAP-wide-low*: CZ samples belong to a widespread European lineage  
207 with low diversity (supposed bottleneck); (3) *HAP-wide-expand*: part of expanding  
208 widespread European lineage (star-like structure); (4) *HAP-wide-complex*: part of a complex  
209 widespread lineage (showing either a stable network with several connections and even  
210 sequences in haplotypes, or combination of a stable network and expansion); (5) *HAP-mix*:  
211 mix of haplotypes (CZ haplotypes with distance >2 mutations); (6) *HAP-West*; (7) *HAP-Italy-*  
212 *Balkans*; (8) *HAP-East-Balkans*; (9) *HAP-Central*: part of a Central European lineage; (10)  
213 *HAP-temperate*: temperate-continental lineage.

214

## 215 **Species traits**

216

217 We prepared data on the following three groups of species traits: (1) Habitat affinity, defining  
218 nine categories: *ubiquitous* (generalist), *mesophilic 1* (grassland), *mesophilic 2* (shrubland),  
219 *mesophilic 3* (woodland), *xerothermophilic 1* (steppe), *xerothermophilic 2* (dry shrubland),  
220 *hydrophilic* (wetland), *tyrphophilic* (bog/peatland), and *alpine* (Benes et al., 2002). If two  
221 categories applied for a species, these were assigned as “0.5” per category.

222 (2) Life history traits linked to dispersal and landscape scale survival (Bartonova,  
223 Benes, Fric, Chobot, & Konvicka, 2016): *density*, the number of individuals which can occur  
224 per area of habitat (adapted from area demand) [ranked 1–9, from sparse to dense] (Reinhardt,  
225 Sbieschne, Settele, Fischer, & Fiedler, 2007); *feeding index*, the trophic range, defined as an  
226 index that weights the number of consumed host plant families [F] and genera [G] in the  
227 Czech Republic:  $(G * F^a)^{1/2}$  where  $a = F/2G$  (Benes et al., 2002; index modified after Garcia-  
228 Barros 2000); *fertility*, the number of eggs per female at eclosion [ranked 1–9] (Reinhardt et  
229 al., 2007); *flight period length*, the number of months of adult flight, summed across  
230 generations and excluding hibernation (Benes et al., 2002); *forewing length*, approximation  
231 for body size [mm] (Higgins & Riley, 1970); *host plant form*, express prevailing host plant  
232 apparency [ranked 1–4, small forbs, large forbs/grasses, bushes, trees] (Cizek, Fric, &  
233 Konvicka, 2006); *mobility*, the propensity to disperse [ranked 1–9, from sedentary to mobile]  
234 (Reinhardt et al., 2007); *overwintering stage* [ranked 1–5, from egg to migrating adult]  
235 (Tolman & Lewington, 2008); and *voltinism*, average number of generations per year in the  
236 Czech Republic (Benes et al., 2002). Missing values of density, fertility, and mobility in the



237 case of species not covered in Reinhardt et al. (2007) (N=39) were treated as in Bartonova et  
238 al. (2016).

239 (3) Threat status, based on national Czech Red List categories (ordinal scale: 1 – least  
240 concern, 2 – near threatened, 3 – vulnerable, 4 – endangered, and 5 – critically endangered)  
241 (Hejda, Farkač, & Chobot, 2017).

242

## 243 **Relating phylogeographic patterns to species traits**

244

245 To investigate the relationships between phylogeographic patterns and traits, we used a  
246 multivariate approach, the unimodal canonical correspondence analyses (CCA) in CANOCO  
247 v.5.0 (Ter Braak & Šmilauer, 2012), which extracts variation in multivariate dependent  
248 variables even if obscured by other larger sources of variation (Ter Braak & Verdonschot,  
249 1995), and tests the significance of the ordinations via the Monte-Carlo permutation tests (999  
250 runs). In these analyses, individual species were the samples, either BAPS or haplotype  
251 network categories were responses, and species traits were predictors. The response variables  
252 were categorical as they identified the group to which a sample (butterfly species) belong.  
253 Since response variables could have been represented by more categories, they entered the  
254 analysis in the form of dummy variables with fuzzy coding (0, 0.5 or 1), and CCA in this case  
255 represented a generalization of linear discriminant analysis (LDA), optimal for categorical  
256 variables, with chi-square distances as generalization of Mahalanobis distances among  
257 observations (Ter Braak & Verdonschot, 1995; Ter Braak & Šmilauer, 2012). CANOCO v.5.0  
258 automatically applies standardization to unit variance (bringing their means to zero and  
259 variances to one) to control for the different dimensions of the predictors. In the case of  
260 habitat affinities and life history traits, two tests were performed: (a) global test, using all  
261 variables and (b) a forward selection procedure, picking a combination of traits that  
262 significantly fit the phylogeographic patterns. Threat status, representing a single explanatory  
263 variable, was also tested using CCA.

264

## 265 **RESULTS**

266

267 The final dataset consisted of 1,110 sequences of the 140 species found in the Czech Republic  
268 (Fig. 1a) (excluding *L. boeticus*); 151 sequences from BOLD and GenBank, and 959 newly  
269 generated (mean=8±5.1 SE sequence per species, range 1–83), which can be found in BOLD  
270 as project BBCZ. We added 20,695 sequences for these species from BOLD originating in

271 other locations. Together, we used 21,805 sequences (mean=156±86.5 SE sequence per  
272 species, range 18–854). The number of species assigned to each BAPS and haplotype network  
273 category are summarized in Fig. 1b and c, and the categories assigned for each species are  
274 found in Supporting Information 1. The BAPS category (Fig. 2) with the highest number of  
275 species was *BAPS-low* (N=36), followed by *BAPS-wide* (N=285). The haplotype network  
276 category (Fig. 3) represented by highest number of species was *HAP-temperate* (N=19.5),  
277 followed by *HAP-wide-complex* (N=18), *HAP-wide-low* (N=17.5), and *HAP-mix* (N=17).

278 In the CCA relating BAPS categories to habitat affinity, the global test revealed a  
279 significant relationship (eigenvalues: 0.23, 0.14, 0.11, 0.09; first axis var. [explained  
280 variation] =3.1%, F=4.2, p=0.046; all axes var.=9.0%, F=1.6, p=0.005). The forward selection  
281 selected *ubiquitous* (i.e., generalist, var.=2.2%, F=3.1, p=0.001) and *xerothermophilic 1* (i.e.,  
282 steppe, var.=1.5%, pseudo-F=2.1, p=0.034) affinities (model's canonical eigenvalues: 0.18,  
283 0.09; total var.=3.7%). The first canonical axis in the forward selection CCA distinguished  
284 *BAPS-East-Balkans*, *BAPS-Italy-Balkans*, *BAPS-wide*, *BAPS-temperate*, and *BAPS-Central*  
285 patterns from *BAPS-mix*, *BAPS-mix-East*, *BAPS-West*, and *BAPS-low* patterns, and showed  
286 that the former tend to be steppe species, whereas the latter are habitat generalists (Fig. 4a).

287 The CCA relating BAPS categories to life history traits also produced significant  
288 ordination (global test eigenvalues: 0.22, 0.20, 0.11, 0.07; first axis var. =3.1%, F=4.1,  
289 p=0.066; all axes var.=9.0%, F=1.4, p=0.015). The forward-selected traits were *host plant*  
290 *form* (var.=1.7%, F=2.3, p=0.014), *forewing length* (var.=1.6%, F=2.3, p=0.015), and  
291 *voltinism* (var.=1.6%, F=2.3, p=0.017) (model's canonical eigenvalues: 0.19, 0.12, 0.05; total  
292 var.=4.9%). The first canonical axis in the forward selection CCA separated species  
293 belonging to categories *BAPS-low*, *BAPS-West*, *BAPS-mix*, and *BAPS-wide*, from those  
294 belonging to *BAPS-Central*, *BAPS-East-Balkans*, *BAPS-temperate*, *BAPS-mix-East*, and  
295 *BAPS-Italy-Balkans*, indicating that the former tend to develop on woody plants, have more  
296 generations per year and a large wingspan; whereas the latter develop on herbs, have less  
297 generations and a small wingspan (Fig. 4b).

298 The BAPS categories were also related to threat status (model's canonical eigenvalue:  
299 0.13; var.=1.8%, F=2.5, p=0.014). The analysis indicated that species with pattern *BAPS-*  
300 *East-Balkans* tend to be the most threatened, followed by *BAPS-Italy-Balkans*, and *BAPS-*  
301 *West*; and those of *BAPS-mix* are the least endangered (Fig. 4c).

302 The global test relating haplotype network categories to habitat affinity was significant  
303 (global test eigenvalues: 0.23, 0.19, 0.12, 0.06; first axis var.=2.7%, F=3.6, p=0.068; all axes  
304 var.= 8.8%, F=1.4, p=0.012). Two significant habitat affinities were forward-selected:

305 *ubiquitous* (var.=2.2%, F=3.1, p=0.002) and *mesophilic 3* (i.e., woodland; var.=2.0%, F=2.9,  
306 p=0.001) (model's canonical eigenvalues: 0.21, 0.16; total var.=4.2%). The first canonical  
307 axis in the forward selection CCA separated species of patterns *HAP-wide-expand*, *HAP-mix*,  
308 *HAP-West*, *HAP-wide-low*, *HAP-low*, from *HAP-Central*, *HAP-East-Balkans*, *HAP-wide-*  
309 *complex*, *HAP-Italy-Balkans*, and *HAP-temperate*, revealing that the former are habitat  
310 generalists and woodland species, whereas the latter are non-woodland specialists (Fig. 4d).

311 Explaining haplotype network categories by life history traits was significant (global  
312 test eigenvalues: 0.35, 0.21, 0.12, 0.10; first axis var.=4.1%, F=5.5, p=0.001; all axes  
313 var.=11.2%, F=1.8, p=0.001). The significant forward-selected variables were *host plant form*  
314 (var.=2.3%, F=3.2, p=0.001), *flight period length* (var.=1.6%, F=2.3, p=0.02), and *feeding*  
315 *index* (var.=1.3%, F=1.9, p=0.042) (model's canonical eigenvalues: 0.25, 0.15, 0.05; total  
316 var.=5.2%). The forward-selected ordination separated patterns *HAP-wide-low*, *HAP-low*,  
317 *HAP-wide-expand*, and *HAP-West* from *HAP-Central*, *HAP-East-Balkans*, *HAP-Italy-*  
318 *Balkans*, *HAP-temperate*, *HAP-mix*, and *HAP-wide complex*. The former species have long  
319 flight periods, develop on tree or shrub host plants, and have a broader feeding niche, in  
320 contrast to the latter species (Fig. 4e).

321 The haplotype network categories were also explicable by threat status (model's  
322 canonical eigenvalue: 0.14; var.=1.7%, F=2.3, p=0.008). Species with patterns *HAP-*  
323 *temperate* and *HAP-East-Balkans* tend to be the most threatened, whereas *HAP-wide-low*,  
324 *HAP-mix*, and *HAP-low* are the least threatened (Fig. 4f).

325

## 326 DISCUSSION

327

328 We barcoded 140 species of butterflies occurring in the Czech Republic, used database data to  
329 visualize the species' biogeographic patterns across Europe, and related the mitochondrial  
330 genetic structure of Czech samples to species traits. We showed that species' habitat use and  
331 life histories influence which of the mitochondrial lineages inhabit a specific area, and these  
332 factors in turn influence their current threat status.

333 Several authors have related quantitative measures of overall species' genetic diversity  
334 and differentiation to species' range sizes, life histories and samples' geographic origins.  
335 Genetic diversity varies greatly in European butterflies, as measured by both mtDNA (Dincă  
336 et al., 2021) and genome-wide markers (Mackintosh et al., 2019). Haplotype diversity itself  
337 could not be explained by life history traits determining dispersal and colonization abilities  
338 (Dapporto et al., 2019). Generalists do not have greater levels of genomic diversity than

339 specialists; only smaller butterflies tend to have higher genomic diversity (Mackintosh et al.,  
340 2019; but see Habel et al., 2013 on landscape level). Population differentiation, on the other  
341 hand, is explicable by life histories. Lower differentiation applies to species with longer flight  
342 periods and higher number of generations. Accordingly, a higher differentiation was  
343 discovered in species with smaller wings, utilising a lower number of host plants, and with  
344 short flight periods, i.e., in specialists (Habel et al., 2013; Dapporto et al., 2017, 2019;  
345 Scalercio et al., 2020). Widespread species also showed high population differentiation  
346 (Dapporto et al., 2019).

347 We use a more detailed approach here, explaining geographic distribution of  
348 individual genetic lineages by species' traits. The Czech Republic well represents temperate  
349 Europe as a whole, owing to its diverse butterfly fauna. We are aware that classification of the  
350 lineage distribution is tied to a specific region. It is also influenced by the amount of available  
351 sequence data and their geographical coverage for a given species. The habitat affinities, and  
352 such life history traits as flight period length or host plant use, and of course the level of  
353 threat, may also vary across species' ranges (e.g., Korb et al., 2016; Lindestad et al., 2022).  
354 Still, we believe that linking genetic lineages and species traits is of general interest: it is  
355 transferable across geographic areas, and so our approach can serve as a template for  
356 analysing the constitution of regional faunas.

357 Both BAPS and haplotype networks categories of lineages present in the Czech  
358 butterfly species revealed matching patterns (Fig. 4) when associated with habitats, and life  
359 histories complemented the picture (cf. Potocký et al., 2018). In principle, generalists and  
360 woodlands dwellers displayed different genetic patterns than specialists and open habitats  
361 species. Specifically, generalists and species of wooded habitats formed mixed lineages, or  
362 displayed shallow genetic patterns, or had Western affinities (Fig. 4 a, d). Such species  
363 frequently developed on shrubs or trees, and displayed generalist traits (multiple generations  
364 per year, long flight periods, long wings, wide host plant ranges) (Fig. 4 b, e). Species of low  
365 genetic diversity (and hence low population differentiation in this case) belong to this group,  
366 which is in agreement with Dapporto et al. (2019). In contrast, open habitats specialists (i.e.,  
367 steppe species) displayed Southern and/or Eastern affinities, or had temperate patterns, or  
368 formed Central European genetic lineages. Such species tended to develop on herbs and  
369 grasses and displayed such specialist traits as small wings, low numbers of generations, short  
370 flight periods, and narrow ranges of host plants (Bartonova et al., 2014). Such species were  
371 linked with high genetic differentiation in Dapporto et al. (2019).

372 The Quaternary history of biomes in Central Europe can explain these findings.  
373 During the mid to late Quaternary, the habitat prevailing in both time and space was the cold  
374 mammoth steppe (Kahlke, 2014), associated with diverse types of open habitats. Evidence  
375 points to *in situ* survival of steppe lineages in Central Europe through the climatic cycles  
376 (Kajtoch et al., 2016; Sucháčková Bartoňová et al., 2021) including the Holocene (Feurdean,  
377 Ruprecht, Molnár, Hutchinson, & Hickler, 2018). That long-term persistence could have  
378 produced higher population differentiation (Dapporto et al., 2019) and observed association  
379 with Central European genetic patterns.

380 The geography of the Czech Republic may determine the association of steppe  
381 butterflies with Southern and Eastern lineages, as the lowland corridors are situated in the  
382 southeast and east. The forest-steppe Pannonian lowlands reach the area, connecting the  
383 Czech Republic with the Balkan Peninsula. An alternative route is through the Moravian  
384 Gate, connecting Czech territory with the lowlands of southern Poland, continuing to the  
385 Pontic steppes (the “Sarmatian route”; Mařan 1958; Sternberg 1998). On the other hand, the  
386 warm lowlands in Bohemia (Elbe river valley) were likely colonized by steppe elements from  
387 Moravia, blocked by mountain chains from similar habitats in Western Europe. This scenario  
388 was documented, e.g., for the ground squirrel *Spermophilus citellus* (Řičanová et al., 2013).

389 Multiple species had a genetic lineage distributed along a similar latitudinal belt  
390 (temperate patterns), lacking the Mediterranean distribution. These were species of open  
391 habitats and habitat specialists. Many genetic lineages could have inhabited the Palearctic  
392 continent alongside the same temperature belt (Maresova et al., 2021), with no barriers to  
393 dispersal in the east-west direction. These species might follow the east-west oceanic-  
394 continental gradient of glacial-interglacial faunal interchange related to moisture (Stewart et  
395 al., 2010). Continental species might have expanded west during the arid glacials, establishing  
396 stable widespread populations, with Mediterranean peninsulas serving as areas of endemism  
397 rather than refugia for them (e.g., in *Agriades optilete*, *Boloria euphrosyne*, *Glaucopsyche*  
398 *alexis*).

399 Woodlands re-expanded across Europe during the Holocene. Thus, as most of the  
400 populations of forest species are relatively newly established, shallow genetic structures,  
401 which we observed for woodland inhabitants and tree feeders, are expected (e.g., in the  
402 European woodland species *Pararge aegeria*, Livraghi et al., 2018; or in *Nymphalis*  
403 *polychloros*, *Celastrina argiolus*). Habitat generalists display similar genetic patterns to the  
404 woodland species, linked especially with a mix of lineages inhabiting the focal area, which  
405 likely diversified in multiple refugia (e.g., *Pieris napi*, *Polyommatus icarus*). Longer flight

406 periods, multiple generations and larger bodies, expressed as longer wings, might facilitate  
407 such swift expansions, making these species good long-distance dispersers (Stevens, Trochet,  
408 Van Dyck, Clobert, & Baguette, 2012). Species with Western patterns (lineages connected to  
409 Iberia, or Iberia and Italy) possess similar traits. Better dispersers might be equipped to cross  
410 the mountains (Fric, Hula, Konvička, & Pavlíčko, 2000), and expansions of woodland  
411 butterflies could have been facilitated by the earlier onset of the Holocene near the Atlantic  
412 coast (Heiri et al., 2014), and slowed down by continental climates surrounding the Balkans,  
413 and/or East Asian refugia.

414 The most threatened species in the Czech Republic are those exhibiting considerable  
415 lineage differentiation across Europe (*BAPS-East-Balkans*, *BAPS-West*, *BAPS-Italy-Balkans*  
416 and *BAPS-temperate*) (e.g., *Pyrgus alveus*, *Hipparchia hermione*, *Polyommatus dorylas*, and  
417 *Polyommatus damon*), whereas the generalists (*BAPS-mix*, *HAP-mix* or *HAP-low*) are the  
418 least endangered (Fig. 4 c, f). This can be related to the dispersal abilities of the latter species  
419 (Dapporto et al., 2019): the higher the differentiation, the more specialized the butterfly is,  
420 and the less likely to survive in a fragmented landscape (Bartonova et al., 2016; Ockinger et  
421 al., 2010). This is supported by the evidence that butterfly species with a higher population  
422 diversification disappeared first from islands (Dapporto et al., 2017). Those species with  
423 higher lineage differentiation across Europe are also threatened in other European countries  
424 (Maes et al., 2019).

425 The existence of distinct lineages across the species ranges was noted already by de  
426 Lattin (1967), and, with the advent of genetic data, investigated in many case studies. Only  
427 now, however, does the vast database data allow us to test predictions on the resolution of  
428 entire faunas. Barcoding of entire faunal groups remains a considerable source of information.  
429 For a better understanding of lineage distribution and suture zones, it would be necessary to  
430 properly cover the whole of Europe, and extend the sampling beyond, to obtain information  
431 for entire species ranges. Barcoding of under-sampled areas, even if not particularly  
432 biodiversity-rich, still represents a powerful tool for discovering the driving forces of  
433 biogeography on a large scale and variety of species, such as the links between  
434 phylogeography and species-specific traits.

435 **FIGURES**

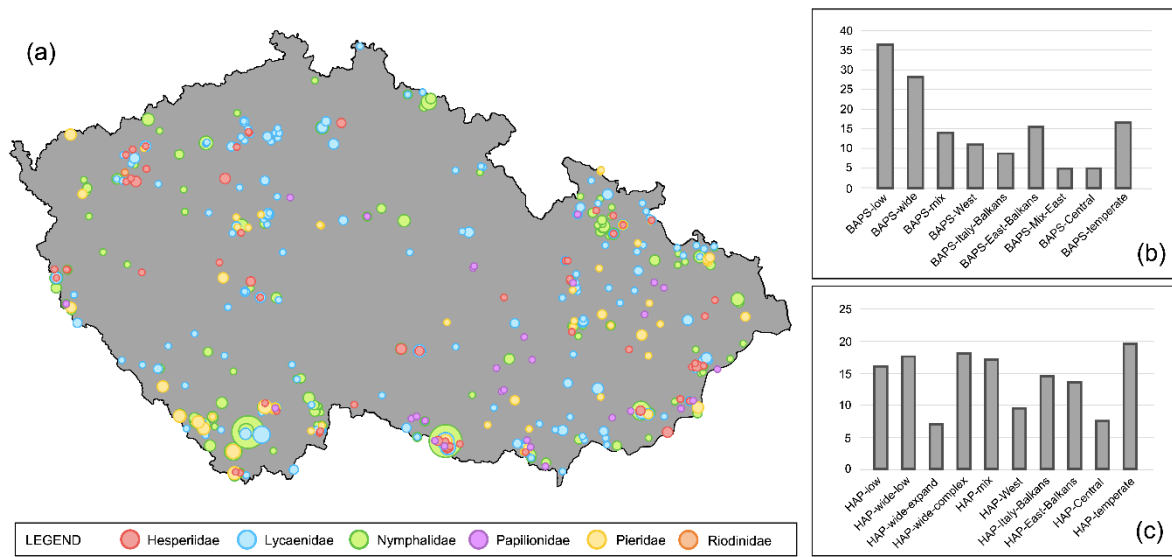

436

437 **Figure 1. (a)** Map of the Czech Republic with samples obtained for Czech butterfly barcoding  
438 (sequencing of the mitochondrial gene COI). The points' sizes reflect the number of samples.  
439 (b–c) Numbers of species with different genetic patterns, as revealed by (b) Bayesian  
440 Analysis of Population Structure (BAPS), and (c) haplotype networks. The map projection is  
441 S-JTSK/Krovak East North.

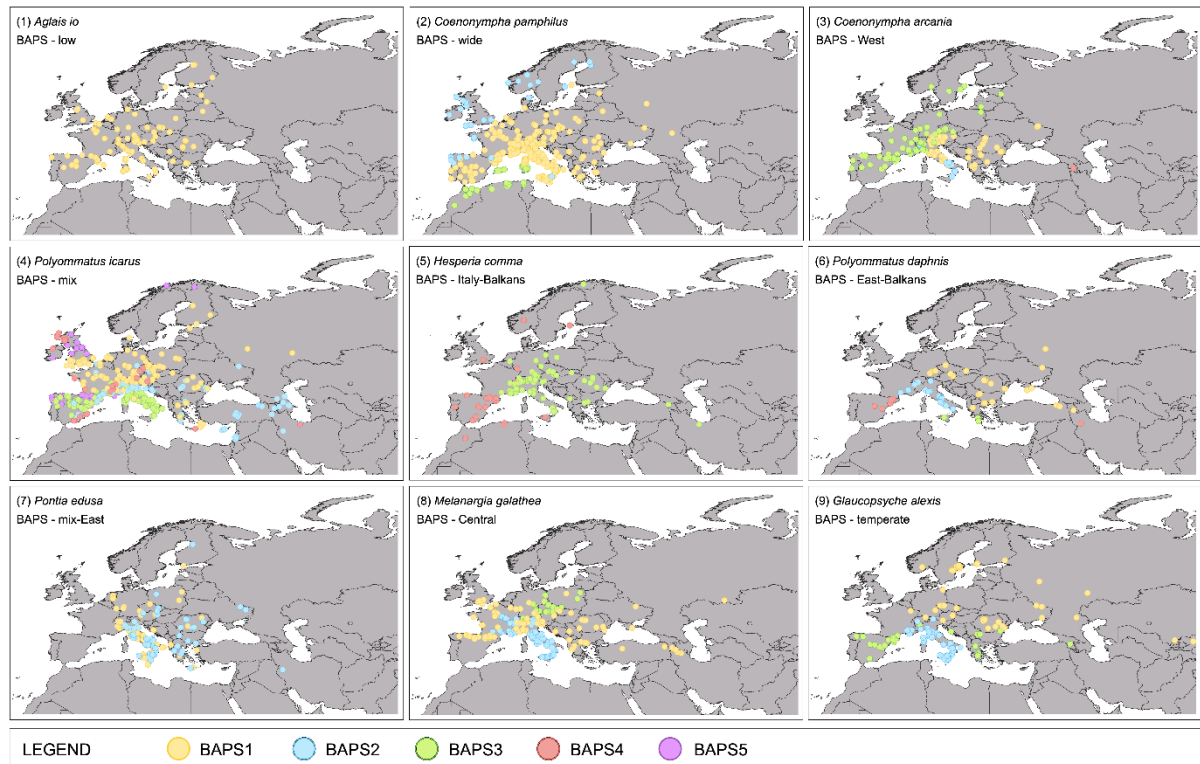

442

443 **Figure 2.** Examples of Czech Republic butterfly species displaying different mitochondrial  
444 genetic patterns according to Bayesian Analysis of Population Structure (BAPS categories),  
445 depicted on the map of Europe. The method is sorting sequences into clusters of genetically  
446 similar individuals (BAPS1–BAPS5, termed here as *genetic lineages*); the number of clusters  
447 is estimated automatically by the ‘rhierbaps’ R package (Tonkin-Hill *et al.* 2018) and differs  
448 among species. Examining the map, based on the presence of genetic lineages in the Czech  
449 Republic, we assigned each of the 140 species into one of nine categories (*BAPS-low*, *BAPS-*  
450 *wide*, *BAPS-West*, *BAPS-mix*, *BAPS-Italy-Balkans*, *BAPS-East-Balkans*, *BAPS-mix-East*,  
451 *BAPS-Central*, and *BAPS-temperate*). Maps were produced in QGIS 3.28.1 (<http://qgis.org>)  
452 with WGS84 projection using country boundaries available at Natural Earth Free vector and  
453 raster map data (<https://www.naturalearthdata.com/>).



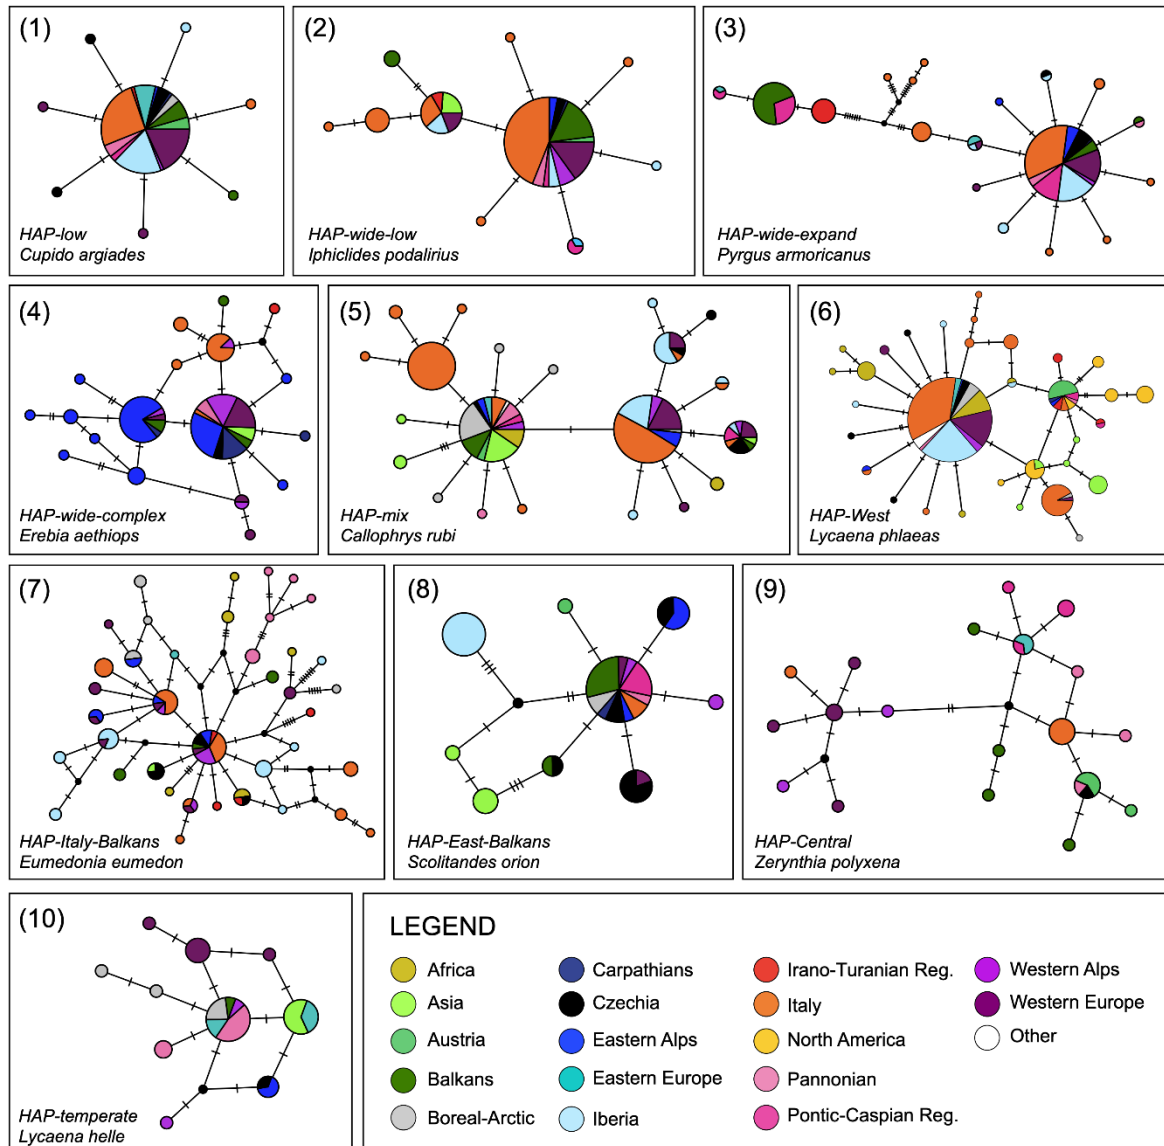

454

455 **Figure 3.** Examples of the Czech butterfly species displaying different mitochondrial genetic  
 456 patterns, obtained by scoring haplotype networks (HAP). Mutations are depicted as black dots  
 457 and hatch marks. Examining the network, based on the relations of haplotypes present in the  
 458 Czech Republic to the other regions, we assigned each of the 140 species into one of ten  
 459 categories (*HAP-low*, *HAP-wide-low*, *HAP-wide-expand*, *HAP-wide-complex*, *HAP-mix*,  
 460 *HAP-West*, *HAP-Italy-Balkans*, *HAP-East-Balkans*, *HAP-Central*, and *HAP-temperate*).

461

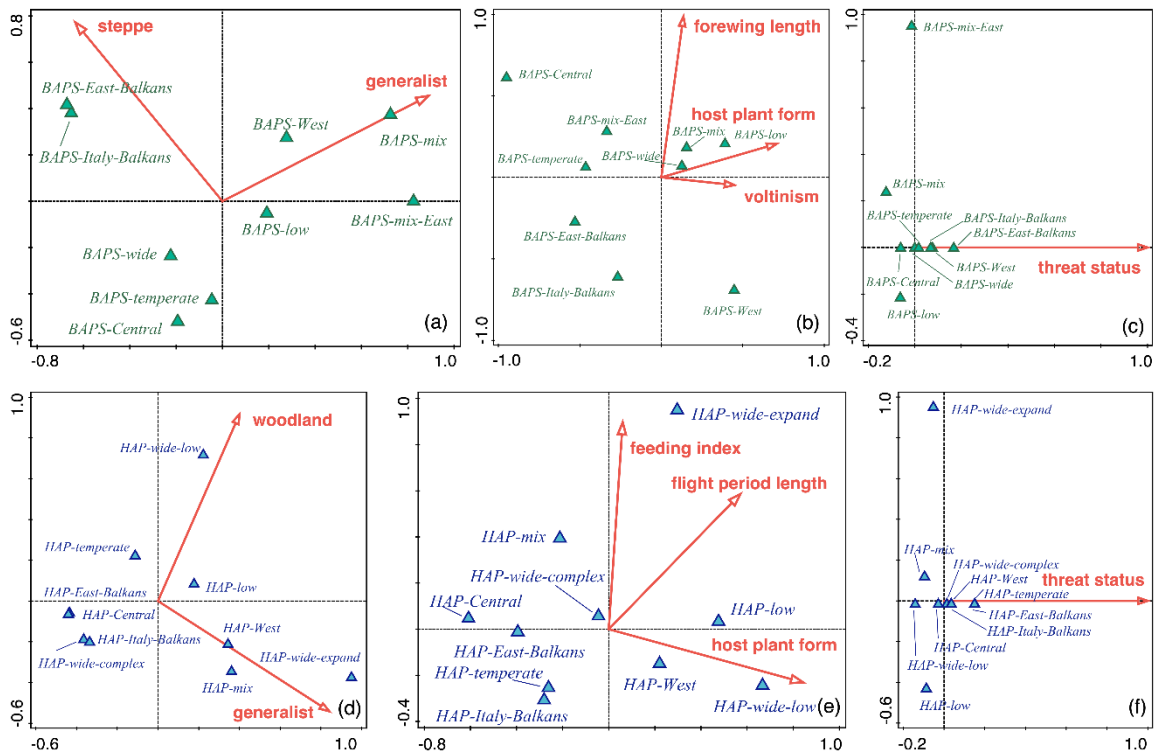

462

463 **Figure 4.** Canonical correspondence analyses (CCA) biplots relating the mitochondrial  
 464 genetic patterns found in Czech Republic butterflies to individual species traits. The  
 465 explanatory variables (species traits) were forward-selected. Upper line: (a–c) patterns from  
 466 Bayesian Analysis of Population Structure (BAPS) interpreted by (a) habitats, (b) life  
 467 histories, (c) Red List categories (threat status) of individual species. Bottom line: (d–f)  
 468 patterns from haplotype networks (HAP) interpreted by (d) habitats, (e) life histories, (f) Red  
 469 List categories (threat status) of the species.

470 **DATA AVAILABILITY**

471

472 The newly generated sequences for Czech butterfly species are deposited in the BOLD  
473 database as the BBCZ Project (CZBB001–CZBB959), and in the NCBI database [accession  
474 codes OR890444–OR891402] [the Project will be publicly available upon publishing]. The  
475 Supplementary Materials (specimen metadata, Nexus alignments for each species, R script for  
476 data handling, species traits and assigned phylogeographic patterns) will be stored at the  
477 figshare repository DOI 10.6084/m9.figshare.24559852.

478 **REFERENCES**

- 479 Altschul, S. F., Gish, W., Miller, W., Myers, E. W., & Lipman, D. J. (1990). Basic local  
480 alignment search tool. *Journal of Molecular Biology*, *215*(3), 403–410.
- 481 Bartonova, A., Benes, J., Fric, Z. F., Chobot, K., & Konvicka, M. (2016). How universal are  
482 reserve design rules? A test using butterflies and their life history traits. *Ecography*,  
483 *39*(5), 456–464.
- 484 Bartonova, A., Benes, J., & Konvicka, M. (2014). Generalist-specialist continuum and life  
485 history traits of Central European butterflies (Lepidoptera) – Are we missing a part of  
486 the picture? *European Journal of Entomology*, *111*(4), 543–553.
- 487 Benes, J., Konvicka, M., Dvorak, J., Fric, Z., Havelda, Z., Pavlicko, A., ... Weidenhoffer, Z.  
488 (2002). *Motýli České republiky: Rozšíření a ochrana I, II* (Vol. 2002). Praha: SOM.
- 489 Cheng, L., Connor, T. R., Sirén, J., Aanensen, D. M., & Corander, J. (2013). Hierarchical and  
490 spatially explicit clustering of DNA sequences with BAPS software. *Molecular*  
491 *Biology and Evolution*, *30*(5), 1224–1228.
- 492 Cizek, L., Fric, Z., & Konvicka, M. (2006). Host plant defences and voltinism in European  
493 butterflies. *Ecological Entomology*, *31*(4), 337–344.
- 494 Dapporto, L., Cini, A., Menchetti, M., Vodá, R., Bonelli, S., Casacci, L. P., ... Vila, R.  
495 (2017). Rise and fall of island butterfly diversity: Understanding genetic  
496 differentiation and extinction in a highly diverse archipelago. *Diversity and*  
497 *Distributions*, *23*(10), 1169–1181.
- 498 Dapporto, L., Cini, A., Vodá, R., Dincă, V., Wiemers, M., Menchetti, M., ... Vila, R. (2019).  
499 Integrating three comprehensive data sets shows that mitochondrial DNA variation is  
500 linked to species traits and paleogeographic events in European butterflies. *Molecular*  
501 *Ecology Resources*, *19*(6), 1623–1636.
- 502 Dapporto, L., Menchetti, M., Vodá, R., Corbella, C., Cuvelier, S., Djemadi, I., ... Vila, R.  
503 (2022). The atlas of mitochondrial genetic diversity for Western Palaearctic  
504 butterflies. *Global Ecology and Biogeography*, *31*(11), 2184–2190.
- 505 de Lattin, G. (1967). *Grundriss der Zoogeographie*. Jena: VEB Gustav Fischer Verlag.
- 506 D’Ercole, J., Dincă, V., Opler, P. A., Kondla, N., Schmidt, C., Phillips, J. D., ... Hebert, P. D.  
507 N. (2021). A DNA barcode library for the butterflies of North America. *PeerJ*, *9*,  
508 e11157.
- 509 Dincă, V., Zakharov, E. V., Hebert, P. D. N., & Vila, R. (2011). Complete DNA barcode  
510 reference library for a country’s butterfly fauna reveals high performance for

- 511 temperate Europe. *Proceedings of the Royal Society B: Biological Sciences*,  
512 278(1704), 347–355.
- 513 Dincă, Vlad, Dapporto, L., Somervuo, P., Vodá, R., Cuvelier, S., Gascoigne-Pees, M., ...  
514 Vila, R. (2021). High resolution DNA barcode library for European butterflies reveals  
515 continental patterns of mitochondrial genetic diversity. *Communications Biology*, 4(1),  
516 1–11.
- 517 Dincă, Vlad, Montagud, S., Talavera, G., Hernández-Roldán, J., Munguira, M. L., García-  
518 Barros, E., ... Vila, R. (2015). DNA barcode reference library for Iberian butterflies  
519 enables a continental-scale preview of potential cryptic diversity. *Scientific Reports*, 5,  
520 12395.
- 521 Feurdean, A., Ruprecht, E., Molnár, Z., Hutchinson, S. M., & Hickler, T. (2018).  
522 Biodiversity-rich European grasslands: Ancient, forgotten ecosystems. *Biological*  
523 *Conservation*, 228, 224–232.
- 524 Folmer, O., Black, M., Hoeh, W., Lutz, R., & Vrijenhoek, R. (1994). DNA primers for  
525 amplification of mitochondrial cytochrome c oxidase subunit I from diverse metazoan  
526 invertebrates. *Molecular Marine Biology and Biotechnology*, 3(5), 294–299.
- 527 Fric, Z., Hula, V., Konvička, M., & Pavlíčko, A. (2000). A note on the recent distribution of  
528 *Aporia crataegi* (Linnaeus, 1758) in the Czech republic (Lepidoptera, Pieridae).  
529 *Atalanta*, 31(3/4), 453–454.
- 530 Galimberti, A., Assandri, G., Maggioni, D., Ramazzotti, F., Baroni, D., Bazzi, G., ...  
531 Casiraghi, M. (2021). Italian Odonates in the Pandora's Box: A Comprehensive DNA  
532 Barcoding Inventory Shows Taxonomic Warnings at the Holarctic Scale. *Molecular*  
533 *Ecology Resources*, 21(1), 183–200.
- 534 Gamba, D., & Muchhala, N. (2020). Global patterns of population genetic differentiation in  
535 seed plants. *Molecular Ecology*, 29(18), 3413–3428.
- 536 Garcia-Barros, E. (2000). Body size, egg size, and their interspecific relationships with  
537 ecological and life history traits in butterflies (Lepidoptera: Papilionoidea,  
538 Hesperioidea). *Biological Journal of the Linnean Society*, 70(2), 251–284.
- 539 Geiger, M. F., Herder, F., Monaghan, M. T., Almada, V., Barbieri, R., Bariche, M., ...  
540 Freyhof, J. (2014). Spatial heterogeneity in the Mediterranean Biodiversity Hotspot  
541 affects barcoding accuracy of its freshwater fishes. *Molecular Ecology Resources*,  
542 14(6), 1210–1221.

- 543 Habel, J. C., Roedder, D., Lens, L., & Schmitt, T. (2013). The genetic signature of  
544 ecologically different grassland Lepidopterans. *Biodiversity and Conservation*, 22(10),  
545 2401–2411.
- 546 Hausmann, A., Haszprunar, G., Segerer, A. H., Speidel, W., Behounek, G., & Hebert, P. D. N.  
547 (2011). Now DNA-barcoded: The butterflies and larger moths of Germany. *Spixiana*,  
548 34(1), 47–58.
- 549 Hebert, P. D. N., Cywinska, A., Ball, S. L., & deWaard, J. R. (2003). Biological  
550 identifications through DNA barcodes. *Proceedings. Biological Sciences*, 270(1512),  
551 313–321.
- 552 Hebert, P. D. N., Ratnasingham, S., & de Waard, J. R. (2003). Barcoding animal life:  
553 Cytochrome c oxidase subunit 1 divergences among closely related species.  
554 *Proceedings of the Royal Society of London. Series B: Biological Sciences*,  
555 270(suppl\_1), S96–S99.
- 556 Heiri, O., Brooks, S. J., Renssen, H., Bedford, A., Hazekamp, M., Ilyashuk, B., ... Lotter, A.  
557 F. (2014). Validation of climate model-inferred regional temperature change for late-  
558 glacial Europe. *Nature Communications*, 5, 4914.
- 559 Hejda, R., Farkač, J., & Chobot, K. (2017). *Červený seznam ohrožených druhů České*  
560 *republiky: BEZOBRATLÍ: Red List of Threatened Species of Czech Republic:*  
561 *INVERTEBRATES*. Praha: Nature Conservation Agency of the Czech Republic.
- 562 Hendrich, L., Morinière, J., Haszprunar, G., Hebert, P. D. N., Hausmann, A., Köhler, F., &  
563 Balke, M. (2015). A comprehensive DNA barcode database for Central European  
564 beetles with a focus on Germany: Adding more than 3500 identified species to BOLD.  
565 *Molecular Ecology Resources*, 15(4), 795–818.
- 566 Hernández-Roldán, J. L., Dapporto, L., Dincă, V., Vicente, J. C., Hornett, E. A., Šíchová, J.,  
567 ... Vila, R. (2016). Integrative analyses unveil speciation linked to host plant shift in  
568 *Spialia* butterflies. *Molecular Ecology*, 25(17), 4267–4284.
- 569 Hewitt, G. (2000). The genetic legacy of the Quaternary ice ages. *Nature*, 405(6789), 907–  
570 913.
- 571 Hewitt, G M. (2004). Genetic consequences of climatic oscillations in the Quaternary.  
572 *Philosophical Transactions of the Royal Society B: Biological Sciences*, 359(1442),  
573 183–195.
- 574 Hewitt, Godfrey M. (1996). Some genetic consequences of ice ages, and their role in  
575 divergence and speciation. *Biological Journal of the Linnean Society*, 58(3), 247–276.

- 576 Hewitt, Godfrey M. (1999). Post-glacial re-colonization of European biota. *Biological*  
577 *Journal of the Linnean Society*, 68(1–2), 87–112.
- 578 Higgins, L. G., & Riley, N. D. (1970). *A Field Guide to the Butterflies of Britain and Europe*.  
579 London: Collins.
- 580 Hofreiter, M., & Stewart, J. (2009). Ecological Change, Range Fluctuations and Population  
581 Dynamics during the Pleistocene. *Current Biology*, 19(14), R584–R594.
- 582 Horáček, I., & Ložek, V. (1988). *Palaeozoology and the Mid-European Quaternary Past:*  
583 *Scope of the Approach and Selected Results*. Praha: Academia.
- 584 Huemer, P., Hebert, P. D. N., Mutanen, M., Wieser, C., Wiesmair, B., Hausmann, A., ...  
585 Fiedler, K. (2018). Large geographic distance versus small DNA barcode divergence:  
586 Insights from a comparison of European to South Siberian Lepidoptera. *PLOS ONE*,  
587 13(11), e0206668.
- 588 Huemer, P., Mutanen, M., Sefc, K. M., & Hebert, P. D. N. (2014). Testing DNA Barcode  
589 Performance in 1000 Species of European Lepidoptera: Large Geographic Distances  
590 Have Small Genetic Impacts. *PLOS ONE*, 9(12), e115774.
- 591 Janoušek, V., Wang, L., Luzynski, K., Dufková, P., Vyskočilová, M. M., Nachman, M. W.,  
592 ... Tucker, P. K. (2012). Genome-wide architecture of reproductive isolation in a  
593 naturally occurring hybrid zone between *Mus musculus musculus* and *M. m.*  
594 *Domesticus*. *Molecular Ecology*, 21(12), 3032–3047.
- 595 Kahlke, R.-D. (2014). The origin of Eurasian Mammoth Faunas (Mammuthus–Coelodonta  
596 Faunal Complex). *Quaternary Science Reviews*, 96, 32–49.
- 597 Kajtoch, Ł., Cieślak, E., Varga, Z., Paul, W., Mazur, M. A., Sramkó, G., & Kubisz, D. (2016).  
598 Phylogeographic patterns of steppe species in Eastern Central Europe: A review and  
599 the implications for conservation. *Biodiversity and Conservation*, 25(12), 2309–2339.
- 600 Kearse, M., Moir, R., Wilson, A., Stones-Havas, S., Cheung, M., Sturrock, S., ... Drummond,  
601 A. (2012). Geneious Basic: An integrated and extendable desktop software platform  
602 for the organization and analysis of sequence data. *Bioinformatics (Oxford, England)*,  
603 28(12), 1647–1649.
- 604 Korb, S. K., Bolshakov, L. V., Fric, Z. F., & Bartonova, A. (2016). Cluster biodiversity as a  
605 multidimensional structure evolution strategy: Checkerspot butterflies of the group  
606 *Euphydryas aurinia* (Rottemburg, 1775) (Lepidoptera: Nymphalidae). *Systematic*  
607 *Entomology*, 41(2), 441–457.

- 608 Kühne, G., Kosuch, J., Hochkirch, A., & Schmitt, T. (2017). Extra-Mediterranean glacial  
609 refugia in a Mediterranean faunal element: The phylogeography of the chalk-hill blue  
610 *Polyommatus coridon* (Lepidoptera, Lycaenidae). *Scientific Reports*, 7, srep43533.
- 611 Leigh, J. W., & Bryant, D. (2015). popart: Full-feature software for haplotype network  
612 construction. *Methods in Ecology and Evolution*, 6(9), 1110–1116.
- 613 Lindestad, O., Nylin, S., Wheat, C. W., & Gotthard, K. (2022). Local adaptation of life cycles  
614 in a butterfly is associated with variation in several circadian clock genes. *Molecular  
615 Ecology*, 31(5), 1461–1475.
- 616 Litman, J., Chittaro, Y., Birrer, S., Praz, C., Wermeille, E., Fluri, M., ... Gonseth, Y. (2018).  
617 A DNA barcode reference library for Swiss butterflies and forester moths as a tool for  
618 species identification, systematics and conservation. *PLOS ONE*, 13(12), e0208639.
- 619 Livraghi, L., Vodã, R., Evans, L. C., Gibbs, M., Dincã, V., Holland, P. W. H., ... Breuker, C.  
620 J. (2018). Historical and current patterns of gene flow in the butterfly *Pararge aegeria*.  
621 *Journal of Biogeography*, 45(7), 1628–1639.
- 622 Macek, J., Laštůvka, Z., Beneš, J., & Traxler, L. (2015). *Motýli a housenky střední Evropy IV.*  
623 *Denní motýli*. Praha: Academia.
- 624 Mackintosh, A., Laetsch, D. R., Hayward, A., Charlesworth, B., Waterfall, M., Vila, R., &  
625 Lohse, K. (2019). The determinants of genetic diversity in butterflies. *Nature  
626 Communications*, 10(1), 3466.
- 627 Maes, D., Verovnik, R., Wiemers, M., Brosens, D., Beshkov, S., Bonelli, S., ... Warren, M. S.  
628 (2019). Integrating national Red Lists for prioritising conservation actions for  
629 European butterflies. *Journal of Insect Conservation*, 23(2), 301–330.
- 630 Mařan, J. (1958). Zoogeografické členění Československa. *Sborník Československé  
631 Společnosti Zeměpisné*, 63, 89–110.
- 632 Maresova, J., Suchackova Bartonova, A., Konvicka, M., Høye, T. T., Gilg, O., Kresse, J.-C.,  
633 ... Faltynek Fric, Z. (2021). The story of endurance: Biogeography and the  
634 evolutionary history of four Holarctic butterflies with different habitat requirements.  
635 *Journal of Biogeography*, 48(3), 590–602.
- 636 Meier, R., Shiyang, K., Vaidya, G., & Ng, P. K. L. (2006). DNA Barcoding and Taxonomy in  
637 Diptera: A Tale of High Intraspecific Variability and Low Identification Success.  
638 *Systematic Biology*, 55(5), 715–728.
- 639 Miller, M. J., Bermingham, E., Turner, B. L., Touchon, J. C., Johnson, A. B., & Winker, K.  
640 (2021). Demographic consequences of foraging ecology explain genetic  
641 diversification in Neotropical bird species. *Ecology Letters*, 24(3), 563–571.



- 642 Monteiro, A., & Pierce, N. E. (2001). Phylogeny of *Bicyclus* (Lepidoptera: Nymphalidae)  
643 inferred from COI, COII, and EF-1alpha gene sequences. *Molecular Phylogenetics*  
644 *and Evolution*, 18(2), 264–281.
- 645 Nürnberger, B., Lohse, K., Fijarczyk, A., Szymura, J. M., & Blaxter, M. L. (2016). Para-  
646 allopatry in hybridizing fire-bellied toads (*Bombina bombina* and *B. variegata*):  
647 Inference from transcriptome-wide coalescence analyses. *Evolution*, 70(8), 1803–  
648 1818.
- 649 Ockinger, E., Schweiger, O., Crist, T. O., Debinski, D. M., Krauss, J., Kuussaari, M., ...  
650 Bommarco, R. (2010). Life-history traits predict species responses to habitat area and  
651 isolation: A cross-continental synthesis. *Ecology Letters*, 13(8), 969–979.
- 652 Pfäffle, M., Bolfíková, B. Č., Hulva, P., & Petney, T. (2014). Different Parasite Faunas in  
653 Sympatric Populations of Sister Hedgehog Species in a Secondary Contact Zone.  
654 *PLOS ONE*, 9(12), e114030.
- 655 Potocký, P., Bartoňová, A., Beneš, J., Zapletal, M., & Konvička, M. (2018). Life-history traits  
656 of Central European moths: Gradients of variation and their association with rarity and  
657 threats. *Insect Conservation and Diversity*, 11(5), 493–505.
- 658 Ratnasingham, S., & Hebert, P. D. N. (2007). bold: The Barcode of Life Data System  
659 (<http://www.barcodinglife.org>). *Molecular Ecology Notes*, 7(3), 355–364.
- 660 Reinhardt, R., Sbieschne, H., Settele, J., Fischer, U., & Fiedler, G. (2007). *Tagfalter von*  
661 *Sachsen*. In B. Klausnitzer & R. Reinhardt (Eds.), *Beiträge zur Insektenfauna*  
662 *Sachsens Band 6. Entomologische Nachrichten und Berichte (vol. 11)*. Dresden.
- 663 Říčanová, Š., Koshev, Y., Říčan, O., Ćosić, N., Ćirović, D., Sedláček, F., & Bryja, J. (2013).  
664 Multilocus phylogeography of the European ground squirrel: Cryptic interglacial  
665 refugia of continental climate in Europe. *Molecular Ecology*, 22(16), 4256–4269.
- 666 Sandom, C. J., Ejrnæs, R., Hansen, M. D. D., & Svenning, J.-C. (2014). High herbivore  
667 density associated with vegetation diversity in interglacial ecosystems. *Proceedings of*  
668 *the National Academy of Sciences*, 111(11), 4162–4167.
- 669 Scalercio, S., Cini, A., Menchetti, M., Vodá, R., Bonelli, S., Bordoni, A., ... Dapporto, L.  
670 (2020). How long is 3 km for a butterfly? Ecological constraints and functional traits  
671 explain high mitochondrial genetic diversity between Sicily and the Italian Peninsula.  
672 *Journal of Animal Ecology*, 89(9), 2013–2026.
- 673 Schmitt, T. (2007). Molecular biogeography of Europe: Pleistocene cycles and postglacial  
674 trends. *Frontiers in Zoology*, 4, 11.

- 675 Schmitt, T., & Varga, Z. (2012). Extra-Mediterranean refugia: The rule and not the exception?  
676 *Frontiers in Zoology*, 9(1), 1–12.
- 677 Sternberg, K. (1998). Die postglaziale Besiedlung Mitteleuropas durch Libellen, mit  
678 besonderer Berücksichtigung Südwestdeutschlands (Insecta, Odonata). The postglacial  
679 colonization of Central Europe by dragonflies, with special reference to southwestern  
680 Germany (Insecta, Odonata). *Journal of Biogeography*, 25(2), 319–337.
- 681 Stevens, V. M., Trochet, A., Van Dyck, H., Clobert, J., & Baguette, M. (2012). How is  
682 dispersal integrated in life histories: A quantitative analysis using butterflies. *Ecology*  
683 *Letters*, 15(1), 74–86.
- 684 Stewart, J. R., Lister, A. M., Barnes, I., & Dalén, L. (2010). Refugia revisited: Individualistic  
685 responses of species in space and time. *Proceedings of the Royal Society of London B:*  
686 *Biological Sciences*, 277(1682), 661–671.
- 687 Sucháčková Bartoňová, A., Konvička, M., Marešová, J., Bláhová, D., Číp, D., Skala, P., ...  
688 Faltýnek Fric, Z. (2021). Extremely Endangered Butterflies of Scattered Central  
689 European Dry Grasslands Under Current Habitat Alteration. *Insect Systematics and*  
690 *Diversity*, 5(5). <https://doi.org/10.1093/isd/ixab017>
- 691 Ter Braak, C. J. F., & Šmilauer, P. (2012). *CANOCO Reference Manual and User's Guide:*  
692 *Software for Ordination (version 5.0)*. Ithaca (NY): Biometris.
- 693 Ter Braak, C. J. F., & Verdonschot, P. F. (1995). Canonical correspondence analysis and  
694 related multivariate methods in aquatic ecology. *Aquatic sciences*, 57(3), 255–289.
- 695 Tolman, T., & Lewington, R. (2008). *Collins butterfly guide: The Most Complete Field Guide*  
696 *to the Butterflies of Britain and Europe*. London: Collins.
- 697 Tonkin-Hill, G., Lees, J. A., Bentley, S. D., Frost, S. D. W., & Corander, J. (2018).  
698 RhierBAPS: An R implementation of the population clustering algorithm hierBAPS.  
699 *Wellcome Open Research*, 3, 93.
- 700 Vera, F. W. M. (2000). *Grazing Ecology and Forest History*. Egham: CABI.
- 701 Warren, M. S., Maes, D., Swaay, C. A. M. van, Goffart, P., Dyck, H. V., Bourn, N. A. D., ...  
702 Ellis, S. (2021). The decline of butterflies in Europe: Problems, significance, and  
703 possible solutions. *Proceedings of the National Academy of Sciences*, 118(2),  
704 e2002551117.
- 705 Weigand, H., Beermann, A. J., Čiampor, F., Costa, F. O., Csabai, Z., Duarte, S., ... Ekrem, T.  
706 (2019). DNA barcode reference libraries for the monitoring of aquatic biota in Europe:  
707 Gap-analysis and recommendations for future work. *Science of The Total*  
708 *Environment*, 678, 499–524.

709 Wiemers, M., Balletto, E., Dincă, V., Fric, Z. F., Lamas, G., Lukhtanov, V., ... Verovnik, R.  
710 (2018). An updated checklist of the European Butterflies (Lepidoptera, Papilionoidea).  
711 *ZooKeys*, 811, 9–45.

712 **BIOSKETCH**

713

714 The authors are experts in insect ecology, phylogeny, phylogeography, and distribution  
715 patterns. The authors focus on the history, the current times and a future of Quaternary  
716 ecosystems. They utilize butterflies, and other insects, as examples, to study the impact of  
717 climate change, extinct megafauna, and habitat alterations on communities. They combine the  
718 diverse scientific approaches and knowledge of the past to contribute to current habitat and  
719 insect conservation. Author contributions: ASB designed the study, collected data, performed  
720 analyses, and wrote the first draft of the manuscript. PŠ performed laboratory work and  
721 analyses. MK collected data and contributed to the writing of the first draft. JB, LS, and VV  
722 collected data. CS and HK performed laboratory work. JPM prepared all graphics in the  
723 manuscript and supplements. ZFF designed the study, collected data, and performed analyses.  
724 All authors contributed substantially to revisions and approved the final version of the  
725 manuscript.

726

727

728 **SUPPORTING INFORMATION**

729

730 **Supporting Information 1.** Detailed summary and results of the Czech Republic butterfly  
731 barcoding (sequencing cytochrome c oxidase subunit 1, COI) for each species occurring in the  
732 country.
